1 **Title**

2 Interstitial spaces are continuous across tissue and organ boundaries in humans

3 **Authors**

4 Odise Cenaj<sup>1</sup>, Douglas H. R. Allison<sup>1</sup>, Imam R<sup>1</sup>, Briana Zeck<sup>1</sup>, Lilly M. Drohan<sup>1</sup>, Luis Chiriboga<sup>1</sup>, Jessica  
5 Llewellyn<sup>2</sup>, Cheng Z Liu<sup>1</sup>, Young Nyun Park<sup>3</sup>, Rebecca G. Wells<sup>2,4,5,6,†</sup>, Neil D. Theise<sup>1,\*†</sup>

6 <sup>1</sup>Department of Pathology, New York University Grossman School of Medicine, New York NY USA;

7 <sup>2</sup>Division of Gastroenterology, Department of Medicine, Perelman School of Medicine at the University

8 of Pennsylvania, Philadelphia PA United States; <sup>3</sup>Department of Pathology, Department of Pathology,

9 Yonsei University College of Medicine, Seoul South Korea; <sup>4</sup>Department of Bioengineering, School of

10 Engineering and Applied Sciences, The University of Pennsylvania, Philadelphia, PA, United States;

11 <sup>5</sup>Department of Pathology and Laboratory Medicine, Perelman School of Medicine at the University of

12 Pennsylvania, Philadelphia, PA, United States; <sup>6</sup>Center for Engineering MechanoBiology, The University

13 of Pennsylvania, Philadelphia, PA, United States

14 † Contributed equally

15 \*Corresponding author

16 Department of Pathology, NYU-Langone Health

17 560 First Avenue, MSB 504-A

18 New York NY 10016 USA

19 Email: [neil.theise@nyulangone.org](mailto:neil.theise@nyulangone.org)

20 Phone: 212-263-5132

21

22

## 23 **Abstract**

24 Bodies have "reticular networks" comprising collagens, elastin, glycosaminoglycans, and other  
25 extracellular matrix components, that are continuous within and around all organs. Fibrous tissue  
26 coverings of nerves and blood vessels create structural continuity beyond organ boundaries. We  
27 recently described fluid flow through such human fibrous tissues. It remains unclear whether these  
28 interstitial spaces are continuous through the body or are discontinuous, confined within individual  
29 organs. We investigated IS continuity using two approaches. Non-biological particles (tattoo pigment,  
30 colloidal silver) were tracked within colon and skin interstitial spaces and into adjacent fascia. We also  
31 exploited hyaluronic acid, a macromolecular component of interstitial spaces. Both techniques  
32 demonstrate continuity of interstitial spaces within and across organ boundaries, including within  
33 perineurium and vascular adventitia traversing organs and the spaces between them. We suggest a  
34 body-wide network of fluid-filled interstitial spaces with significant implications for molecular signaling,  
35 cell trafficking, and the spread of malignant and infectious disease.

36

## 37 **Introduction**

38 The work of Franklin Mall over a century ago<sup>1,2</sup> as well as modern day decellularization techniques<sup>3</sup>  
39 demonstrate that there are "reticular networks" made up of collagens, elastin, glycosaminoglycans, and  
40 other extracellular matrix (ECM) components surrounding, within, and between organs. These networks  
41 have biological and mechanical roles in defining the architecture and physiology of organs and, as a  
42 result, are now used as scaffolding for the creation of customized organ grafts for regenerative  
43 medicine.<sup>4</sup> Multiorgan decellularization has further confirmed that ECM networks extend beyond the  
44 confines of single organs to involve neighboring structures, including thoracic (heart), abdominal (liver,  
45 gut, kidneys) and pelvic (uterus, prostate, urinary bladder) organs with their vasculature and

46 surrounding fibrous, adventitial sheaths, creating structural continuity across organ boundaries.<sup>5</sup> More  
47 recently, decellularization of entire fetal sheep shows that the connective tissue network is continuous  
48 throughout the body and that the connective tissue of nerves creates structural continuity between the  
49 nervous system and other tissues.<sup>3</sup> Dissection of human bodies likewise demonstrates continuity across  
50 large, multiorgan regions of the body, including the entirety of the dermis and the fascia of diverse  
51 organs and organ systems.<sup>6,7,8,9</sup>

52 Clinical disciplines including osteopathy have suggested that these connective tissue networks contain  
53 fluid and represent a body-wide communications network, akin to interstitial spaces, although this lacks  
54 detailed microscopic confirmation. Interstitial spaces in which nutrient and waste exchange take place  
55 have historically been recognized at two scales: intercellular spaces ( $\leq 1$  micron) and pericapillary spaces  
56 ( $\sim 10$  microns).<sup>10</sup> We recently described fluid flow through large interstitial spaces of the human  
57 extrahepatic bile duct submucosa and the human dermis, 50-70  $\mu\text{m}$  below the epithelial surface.<sup>11,12</sup> We  
58 further showed that other fibrous tissues, including the submucosae of all other visceral organs and the  
59 subcutaneous fascia, are structurally similar, and hypothesized that they likewise support fluid flow. In  
60 all of these tissues, the spaces were defined by a network of collagen bundles 20-70  $\mu\text{m}$  in diameter.  
61 Many of the collagen bundles were lined by spindle-shaped cells that co-expressed vimentin and CD34,  
62 but were devoid of endothelial ultrastructural features and were thus considered fibroblast-like cells. In  
63 this context, we refer to them as "interstitial lining cells." In vivo endomicroscopy has shown that  
64 musculoskeletal fascia includes similar large-caliber fluid-filled spaces.<sup>13</sup> It remains unclear, however,  
65 whether these interstitial compartments are continuous through the body or represent discontinuous  
66 fluid-filled channels confined within individual organs. A limited demonstration of such intra-tissue  
67 continuity is found in the work of Mall, who reported that the interstitial spaces of liver portal tract  
68 stroma are continuous between peri-arterial, peri-venular, and peri-ductal compartments (the "space of  
69 Mall"),<sup>1</sup> but these studies were only at the local, intrahepatic level.

70 We investigated the question of interstitial space continuity using two orthogonal approaches. The first  
71 was to study movement of non-biological particles (tattoo pigment and colloidal silver) across tissue  
72 compartments within colon and skin and into adjacent fascia. The second exploited hyaluronic acid  
73 (HA), a macromolecular component of the smallest interstitial spaces (i.e. between cells and around  
74 capillaries) as well as the larger fibroconnective tissue spaces we recently identified.<sup>10,14-16</sup> We  
75 demonstrate continuity across organ boundaries and between spaces in all fibrous tissues studied,  
76 including the perineurium and vascular adventitia within them. We suggest that there is a broad and  
77 interconnected network of interstitial fluid-filled channels throughout the body, including the structural  
78 coverings of nerves and vessels, and that this has significant implications for molecular signaling, cell  
79 trafficking, and the spread of malignant and infectious disease.

80

## 81 **Results**

### 82 **Tattoo pigment and colloidal silver are found at a significant distance from original sites of** 83 **application**

84 Skin samples with tattoos injected into dermis for cosmetic reasons were examined for the presence of  
85 pigment particles distant from the dermis. In 3 samples obtained from different patients, particles were  
86 identified in papillary and reticular dermis and subcutaneous fascia (**Fig. 1a**). The particles were localized  
87 both intracellularly, within the cytoplasm of macrophages and interstitial lining cells, and extracellularly,  
88 within interstitial spaces between collagen bundles of the collagenous network of the dermis and  
89 subcutaneous fascia (**Fig. 1b,c**). Silver particles were observed in similar locations in two samples from a  
90 patient who developed argyria after topical application of colloidal silver (**Fig. 2a-f**). Silver particles were  
91 also identified in the adnexa, perivascular adventitia and perineurium in the dermis (**Fig. 2g-l**).

92 Colon resection specimens with endoscopically-injected tattoos also demonstrated pigment particles  
93 distant from the original submucosal injection site. In samples from all 5 specimens studied, pigment  
94 particles were identified not only in colonic submucosa, but also in the muscularis propria and  
95 mesenteric fascia (**Fig. 3a**). In a similar fashion to the findings in the skin, pigment particles were both  
96 intracellular and within interstitial spaces of the collagenous network of colonic submucosa, muscularis  
97 propria and mesenteric fascia (**Fig. 3b-d**). We previously demonstrated such movement of tattoo  
98 pigment from colonic submucosa to draining lymph nodes of the mesentery.<sup>11</sup>  
99 Because particles are found within macrophages which were shown previously to migrate to regional  
100 lymph nodes,<sup>11</sup> one possible explanation for the appearance of extracellular particles at a distance is  
101 that they were carried there intracellularly and then released. Additionally, it is possible with the tattoo  
102 pigment that the initial injection was deep enough to explain our findings, though this would not explain  
103 the silver particles as they were absorbed from a topical application. We therefore measured the  
104 diameter of the extracellular tattoo pigment particles as a function of the depth of their location in the  
105 bowel (**Fig. 4a**). Particles in deep mesenteric interstitial spaces were significantly smaller than those in  
106 more superficial compartments; the mean particle size in deep mesenteric fascia was 0.46  $\mu\text{m}$  versus  
107 0.61  $\mu\text{m}$  in superficial mesenteric fascia and muscularis propria, and 0.76  $\mu\text{m}$  in submucosa ( $p < 0.01$  for  
108 all comparisons; **Fig. 4b**). These data suggest that particles were carried via fluid flow rather than via  
109 cells, which would have likely resulted in an even distribution of sizes regardless of distance.

110

### 111 **Hyaluronic acid staining shows continuity between interstitial spaces across organ boundaries**

112 HA is found in interstitial spaces throughout the body at all stages of development.<sup>10,14-16</sup> The physical  
113 properties of HA suggest that it regulates flow of fluid and other solutes and small molecules within  
114 interstitial fluid;<sup>17</sup> it did not prevent filling by fluorescein in vivo.<sup>11</sup> We confirmed by staining with HA  
115 binding protein (HABP) that it is found broadly in intercellular, pericapillary and perineural, and

116 submucosal and dermal interstitial spaces. This staining showed that non-vascular spaces that appear as  
117 white and therefore "empty" by H&E staining are not, in fact, empty, but contain HA (**Fig. 5**). The  
118 smallest interstitial spaces between cells are filled with HA including those between epidermal  
119 keratinocytes (**Fig. 5a,b**) and within dermal nerve fibers (**Fig. 5g,h**). Pericapillary scale interstitial spaces  
120 (lamina propria of colon) were similar (**Fig. 5c,d**). Larger, fibroconnective tissue interstitial spaces filled  
121 by HA were observed in dermis (**Fig. 5a,b**) and submucosa and in peri-arterial (**Fig. 5e,f**) and perineurial  
122 fibroconnective tissues (**Fig. 5g,h**). HA is thus a surrogate marker of many if not most interstitial spaces.  
123 Staining for HA in colon demonstrated that there were connections between all layers from lamina  
124 propria through muscularis mucosae to submucosa, and then through muscularis propria into subserosa  
125 and mesenteric fascia (**Fig. 6**). Continuity between interstitial spaces in the submucosae and the  
126 perivascular adventitia and perineurium in the bowel wall was also evident (**Fig. 7**).  
127 In the skin, HA-filled interstitial spaces were continuous from intercellular spaces of the epidermis into  
128 papillary dermis (**Fig. 5a,b, 8a,b**) and then to the reticular dermis (**Fig. 8a-d**) and deeper into  
129 subcutaneous fascia (**Fig. 8a,b, e,f**). Intercellular and pericapillary interstitial spaces of subcutaneous  
130 adipocytes are continuous with the interwoven subcutaneous fascia and with perivascular adventitia  
131 (**Fig. 8e,f**).  
132 Similarly, the space of Mall in the portal tracts of the liver shows HA staining between the interstitial  
133 spaces of stroma around the intrahepatic bile duct and of the stroma around the hepatic artery and  
134 portal vein, indicating continuity (**Fig. 9**).

135

### 136 **Multiple tumor types move through interstitial spaces**

137 Movement of tumor through these interconnected interstitial spaces is demonstrated in cases of  
138 peribiliary spread of cholangiocarcinoma, which tracks between collagen fibers through the biliary  
139 submucosa and throughout the space of Mall, while respecting the rigid boundary of the limiting plate

140 of hepatocytes (**Fig. 10a, b**).<sup>18,19</sup> Similarly, colon adenocarcinoma may be seen moving between collagen  
141 bundles and between muscle bundles of the muscularis propria into the mesentery (**Fig. 10c,d**) and  
142 malignant melanoma is known to give rise to "in transit" metastases within the dermis without evidence  
143 of lymphovascular invasion (**Fig. 10e**).<sup>20,21</sup> The presence of melanoma tumor nests between collagen  
144 bundles (**Fig. 10f**) without an associated desmoplastic reaction, similar to the appearance of  
145 macrophages with tattoo pigment in Fig 3c, supports that the cells are within pre-existing interstitial  
146 spaces and have not elaborated tissue-destructive digestive enzymes.

147

## 148 **Discussion**

149 We demonstrate here that non-biological pigment particles (cosmetic tattoos and colloidal silver in skin  
150 and endoscopically-injected tattoo pigment in colon) are found across classically defined tissue  
151 boundaries from their sites of entry into the body, within subcutis and mesentery, respectively,  
152 indicating movement across compartments traditionally thought to be anatomically separate. We also  
153 use HABP staining to show that interstitial spaces are continuous between tissue compartments and  
154 fascial planes in the colon, skin, and liver, as well as within the fibrous tissues around blood vessels and  
155 nerves. Taken together, the data indicate that there is continuity of these interstitial spaces within  
156 organs (shown here for skin and colon) and outside of organs (shown here for skin into subcutis and  
157 colon into mesentery).

158 Although movement of pigment particles could occur via macrophage engulfment and migration, our  
159 data suggest that this is unlikely. The significantly smaller mean particle size in progressively deeper  
160 layers of the bowel wall suggests that particles were mostly carried via fluid flow rather than by  
161 macrophage carriage and subsequent release, as cell-mediated transport would have resulted in an  
162 even distribution of sizes regardless of distance. Absence of a need for cell-based particle movement is  
163 similarly highlighted by the presence of colloidal silver through all layers of skin, without evidence of

164 macrophage engulfment (**Fig. 2**). The argyria specimens also make it unlikely that the spread of tattoo  
165 pigment injection was due to mechanical pressure from the injection: the colloidal silver was applied as  
166 a topical agent on the skin, diffusing through the epidermis into the deeper layers without  
167 instrumentation. Its dissemination into sub-epidermal stroma and then into the epithelia of the adnexal  
168 structures suggests that basement membranes are permeable to movement of minute extracellular  
169 particles (**Fig. 2**).

170 The large interstitial spaces, which appear as empty white spaces on routine formalin-fixed, paraffin-  
171 embedded histochemically-stained specimens, are filled with HA. This finding allowed us to demonstrate  
172 that interstitial spaces are continuous between tissue compartments and fascial planes in the colon,  
173 skin, and liver, as well as within the fibrous tissues around blood vessels and nerves, which may pass  
174 through multiple organs.

175 While this has not, to our knowledge, been demonstrated previously for skin and colon and their  
176 adjacent tissues, it confirms Mall's experimental demonstration of continuity within the portal tract  
177 stroma.<sup>1</sup> Mall demonstrated that pigmented gelatinous substances (cinnabar and Prussian blue)  
178 distributed into the microanatomic structures of the portal tract following their injection into the  
179 vascular supply of cat livers. Based on Mall's experimental observations, the perivascular and periductal  
180 portal tract stroma can be visualized as a unified network of fibers with intervening spaces that  
181 communicate with each other and are in continuity with the vascular (entrance) and lymphatic (egress)  
182 systems in the liver. Our findings are in agreement with Mall's observations: HA staining was present in  
183 a continuous fashion within portal tract stroma ensheathing hepatic arteries, portal veins, and the biliary  
184 tree, in support of there being a continuous space. The intrahepatic portal triads show how spaces that  
185 are in and around structures including arteries, veins, nerves, and ducts (such as ureters, urethra,  
186 epididymis, Fallopian tubes, salivary gland exocrine ducts) that pass through multiple tissues and organs  
187 could serve as conduits for interstitial fluid.



188 Particle movement by flow through fluid-filled channels likely arises from external and internal  
189 (physiologic) mechanical forces such as peristalsis of the gut, positional or mechanical pressure on the  
190 skin and subcutaneous tissues, and rhythmic compression of perivascular/adventitial stroma resulting  
191 from arterial wall expansion in systole. Diaphragmatic movement between inhalation and exhalation will  
192 also cause rhythmically oscillating pressures on tissues in the thorax and the abdomen that may not  
193 have strong driving pressures from other sources, such as the mesentery. Movement of fluid through  
194 interstitial spaces of the perineurium may be subject to all these influences, as well as limited by the  
195 phenomenon of interstitial exclusion.<sup>17</sup>

196 Conventional models suggest that the extracellular matrix serves as a physical barrier to cancer cell  
197 migration and that destructive breakdown by matrix metalloproteinases is a prerequisite step for cancer  
198 cell invasion and metastasis. However, extensive work has shown that cancer invasion, at least in its  
199 initial steps, is largely non-destructive, without significant tissue remodeling, and that malignant cells  
200 can traffic through pre-existing interstitial spaces, which likely serve as routes of least resistance.<sup>22-26</sup> In  
201 keeping with this work, our findings, as shown in **Fig. 10**, may explain some features of classically  
202 recognized cancer behavior such as tumor cell spread within an organ tissue plane (single-cell filing of  
203 lobular carcinoma of the breast, linitis plastica of the stomach and, as shown in this study, periductal  
204 spread of cholangiocarcinoma). Likewise, continuity across tissue planes could explain the clinically  
205 recognized "discontinuous" spread of cancer such as mesenteric tumor deposits of colorectal cancer and  
206 subcutaneous melanoma "in transit" metastases (**Fig. 10c-f**).

207 These findings have important implications for other processes such as infections, autoimmunity, and  
208 host-microbiome interactions. Interstitial spaces across the human body could act as pathways for both  
209 commensal micro-organisms of the human microbiome and various pathogens. Direct continuity across  
210 tissue planes may explain necrotizing fasciitis, a fulminant form of soft tissue infection resulting from  
211 virulent bacterial strains that gain access to the interstitial spaces and cause widespread necrosis of

212 subcutaneous and perimuscular fascia and even cross the blood:brain barrier to cause meningitis.<sup>27</sup>  
213 Continuity across the layers of the intestine and through the mesenteric and portal vein adventitia may  
214 provide a direct route for the translocation of gut bacteria to the liver ("gut-liver axis").<sup>28,29</sup> The existence  
215 of these pathways, in parallel with the mesenteric lymphatic and portal venous systems, may play a  
216 significant role in gut microbiota signaling not only in chronic liver disease and cirrhosis, but also in the  
217 context of autoimmune disorders, both liver-specific (autoimmune hepatitis) and systemic.<sup>30</sup> New  
218 evidence shows that the central nervous system has a system of lymphatic vessels that line the dural  
219 sinuses and connect the cerebrospinal fluid space to the cervical lymph nodes; one anatomic route of  
220 this connection could be via the peri-arterial adventitia of the carotid arteries.<sup>31,32</sup> The presence of  
221 interconnected interstitial spaces of channels that track along the perineurium of the peripheral nerves  
222 provides a potential novel route of communication between the gut and the brain ("gut-brain axis").<sup>33</sup>  
223 We demonstrate that the fibrous layers of nerves and blood vessels have no discrete separation from  
224 the fibrous components of the organs through which they travel and that, likewise, their interstitial  
225 spaces are not segregated from each other. Thus, we suggest that there is continuity of fibrous tissue  
226 interstitial spaces within and between organs and that these spaces are also potentially continuous  
227 between more distant parts of the body, at least along the vasculature and nerves. We speculate that  
228 these spaces serve as pathways for molecular signaling and cell trafficking in a way that is both in series  
229 and in parallel with the established pathways of the cardiovascular and lymphatic systems, although  
230 flow is likely limited by the structural proteins and glycosaminoglycans of the interstitium.<sup>17</sup> Given that  
231 the estimated volume of interstitial fluid in the body is more than 3 times the combined fluid volume of  
232 the cardiovascular and lymphatic systems,<sup>34</sup> the existence of an interconnected interstitial compartment  
233 suggests an anatomic basis for understanding both physiological processes and disease pathophysiology.

234

## 235 **Methods**

## 236 **Patients and Tissue Specimens**

237 Formalin-fixed, paraffin-embedded (FFPE) archival anatomic pathology tissue blocks were collected from  
238 a) surgical segmental colectomy specimens performed for the treatment of malignant polyps (5  
239 patients), all of which contained tattoo pigment (India ink) that was injected into colonic submucosa  
240 adjacent to the lesion at the time of colonoscopy and prior to surgery, b) skin punch biopsy specimens  
241 which included cosmetic tattoos (3 patients), c) two skin punch biopsy specimens containing colloidal  
242 silver in a patient with argyria after topical skin application of colloidal silver (1 patient), and d) resection  
243 specimens of otherwise normal liver containing metastatic tumor (4 patients). Inclusion criteria were:  
244 bowel specimens – the presence of all anatomic compartments (mucosa, submucosa, subserosa and  
245 mesentery) within the tissue section; skin specimens – the presence of epidermis, dermis, and  
246 subcutaneous fascia and adipose tissue. Samples from patients less than 18 years old were excluded.  
247 The study was conducted in accordance with the guidelines and regulations and with the approval of the  
248 New York University Langone Health Institutional Review Board.

249

## 250 **H&E Staining, Scanning and Decolorization**

251 FFPE specimens were sectioned at 5  $\mu\text{m}$  onto charged slides (Fisher Scientific, Cat # 22-042-924). Slides  
252 were dried for 1 h at 60°C, deparaffinized in xylene, rehydrated through a graded series of ethanols, and  
253 rinsed in distilled water. Slides were hematoxylin (Richard-Allan Scientific, Cat# 7211) and eosin (Leica,  
254 Cat# 3801619) stained using standard laboratory protocol.<sup>35</sup> Upon completion of staining, slides were  
255 dehydrated through a series of ethanols and xylene, and mounted with Cytoseal 60 (Richard-Allan  
256 Scientific, Cat# 8310-4). Slides were scanned using a Leica Biosystems Aperio AT2 System and digitally  
257 archived via eSlide Manager (Version 12.3.2.5030). Following scanning, H&E slides were immersed in  
258 xylene to remove coverslips. Slides were rehydrated through xylene, graded ethanol, and running  
259 distilled water, decolorized with 10% acetic acid in 70% ethanol for 1 h, rinsed in distilled water, and

260 then further decolorized in 70% ethanol for 2-3 h. Evaluation for the decolorization end-point was  
261 checked every 30 min.<sup>36,37</sup> Once decolorization was complete, slides were rinsed in running distilled  
262 water.

263

#### 264 **Multiplex Immunohistochemistry**

265 Unconjugated murine anti-human Vimentin (Ventana Medical Systems, Cat# 790-2917, RRID:  
266 AB\_2335925) clone V9, unconjugated murine anti-human CD34 (Ventana Medical Systems, Cat# 790-  
267 2927, RRID: AB\_2336013) clone QBEnd/10, and unconjugated murine anti-human CD68 (Ventana  
268 Medical Systems, Cat# 790-2931, RRID: AB\_2335972) clone KP1 were used for chromogenic  
269 immunohistochemistry. Biotinylated HABP (Calbiochem, Cat# 385911) was used for a non-immune  
270 chromogenic assay. The protein binds specifically to HA ( $\geq 2000$  M.W).<sup>38</sup> Biotinylated HABP is directly  
271 detected using a streptavidin peroxidase-DAB detection system.

272 Chromogenic immunohistochemical multiplexing (mIHC) was performed on a Ventana Medical Systems  
273 Discovery Ultra using Ventana reagents except as noted, according to the manufacturer's instructions  
274 and best practices.<sup>39,40</sup> Slides were dried in a 60°C incubator for 1 h and deparaffinized on-instrument.  
275 Decolorized samples for mIHC bypass prerun incubation and deparaffinization and are started directly  
276 from buffer. All sample sets were run with a tissue microarray as a positive, negative and mIHC  
277 crossover controls.

278 For the HABP-Vimentin-CD34 triplex assay, endogenous peroxidase was blocked with 3% hydrogen  
279 peroxide for 8 min at 37°C. HABP was applied at 0.5 $\mu$ g/ml (1:100 dilution) in tris-buffered saline with  
280 1% bovine serum albumin (TBSA) and incubated for 12 h at room temperature. The biotinylated protein  
281 was then directly detected using horseradish peroxidase-conjugated streptavidin with DAB substrate.  
282 Sections were then antigen retrieved using Cell Conditioner 1 (Tris-Borate-EDTA pH8.5) for 20 min at  
283 95°C. Peroxide blocker was reapplied as above. Vimentin antibody was applied without dilution and

284 incubated for 20 min at 37°C followed by a goat anti-mouse horseradish peroxidase (HRP)-conjugated  
285 multimer applied for 8 min at 37°C. This was detected with purple (tyramide-TAMRA) chromogen for 8  
286 min at 37°C. Subsequently, sections were denatured in Reaction Buffer (Cat# 950-300) for 32 min at  
287 95°C. Endogenous peroxidase was blocked as previously described. CD34 was applied neat for 60 min at  
288 37°C. A goat anti-mouse secondary HRP-conjugated multimer was applied neat for 8 min at 37°C and  
289 detected using teal (tyramide-Cy5) chromogen for 16 min at 37°C. Slides were subsequently dehydrated,  
290 cover-slipped and scanned.

291 Extracellular versus intracellular localization of pigment particles was assessed on sections stained with  
292 duplex immunohistochemistry for CD68 (macrophage marker) and CD34 (marker of interstitial lining  
293 cells). For the CD68-CD34 duplex assay, CD34 antibody was applied neat to deparaffinized slides for 60  
294 min at 37°C. Goat anti-mouse secondary HRP-conjugated multimer secondary was applied neat for 8  
295 min at 37°C and detected using Teal chromogen for 8 min at 37°C. Slides were denatured in reaction  
296 buffer for 32 min at 95°C followed by antigen retrieval using Cell Conditioner 1 for 20 min at 91°C. CD68  
297 was applied neat for 32 min at 37°C. A goat anti-mouse secondary alkaline phosphatase-conjugated  
298 multimer was applied for 8 min at 37°C and detection was completed using Yellow (tyramide-dabsyl)  
299 chromomgen for 8 min at 37°C. Slides were subsequently dehydrated, coverslipped and scanned.

300

### 301 Particle Size Measurement and Statistical Analysis

302 Sizes of 50 tattoo pigment particles were measured using eSlide Manager digital annotation ruler tool.  
303 It was not possible to measure the size of particles within macrophages because particles were often  
304 stacked up on each other in the cytoplasm. Student t test was used to analyze discrete data. All  
305 statistical analyses were two-tailed. P values less than 0.05 were considered statistically significant.

306

### 307 **Figure Legends**

308 **Fig. 1. Tattoo pigment in interstitial spaces of the dermis and subcutaneous fascia. a.** H&E section of  
309 skin and subcutaneous fascia with cosmetically injected brown-black tattoo pigment. Pigment particles  
310 are present in papillary and reticular dermis and subcutaneous fascia, visible at low magnification. **b,c.**  
311 Higher magnification views of the rectangular areas demonstrate both intracellular particles (within  
312 macrophages; long arrows) and extracellular particles (within interstitial spaces; short arrows) of the  
313 papillary dermis (**b**), reticular dermis and subcutaneous fascia (**c**). Scale bars = 100  $\mu$ M.

314 **Fig. 2. Topically-applied colloidal silver particles are found in the subcutaneous fascia.** Juxtaposed light  
315 field and dark field microscopy of regions of the same H&E sections: epidermis and papillary dermis  
316 (**a,b**), reticular dermis (**c,d**), subcutaneous fascia (**e,f**), adnexa (**g,h**), arteriole with adventitia (**i,j**) and  
317 peripheral nerve (**k,l**). Silver particles (which appear as very fine brown-black granules on light  
318 microscopy, some labeled with black arrows, and bright granules on dark field microscopy, some labeled  
319 with white arrows) are identified in the interstitial spaces of papillary and reticular dermis, and those of  
320 the subcutaneous fascia, as well as in the basement membrane of adnexal structures, in perivascular  
321 adventitia, and in perineurium. Scale bars = 50  $\mu$ M.

322 **Fig. 3. Tattoo pigment in interstitial spaces of the colon and mesenteric fascia. a.** H&E section of colon  
323 resection specimen with endoscopically injected tattoo pigment. Pigment particles are present in  
324 submucosa, muscularis propria, and mesenteric fascia. **b.** Higher magnification view of the submucosa  
325 demonstrates both intracellular particles (within macrophages; thick arrows) and extracellular particles  
326 (within interstitial spaces; thin arrows). **c** Intermediate power view of the muscularis propria shows  
327 pigment-containing macrophages (thick arrows) within interstitial spaces between muscle bundles  
328 (compare to Fig. 10c for similar display of movement by carcinoma). **d.** Mesenteric fascia has  
329 intracellular and intercellular pigment as seen in all other layers. Scale bars = 100  $\mu$ M.

330 **Fig. 4. Tattoo pigment particle distribution in the colon. a** Pericolonic mesenteric tissues with tattoo  
331 pigment within interstitial spaces (black arrows), within macrophages (yellow arrows), and within

332 interstitial lining cells (teal arrows). Selected areas in colonic submucosa, muscularis propria/superficial  
333 mesenteric fascia, and deep mesenteric fascia were examined at high power magnification. Double  
334 immunostain for CD68 (macrophage marker; yellow) and CD34 (interstitial lining cell marker; teal). **b**  
335 Distribution of particles by size in compartments at increasing distance from lumen. Scale bars = 100  
336  $\mu\text{M}$ .

337 **Fig. 5. Hyaluronic acid is a marker of interstitial spaces.** Full thickness skin and colon samples were  
338 stained with H&E (top panels), then decolorized and restained using a multiplex chromogenic assay  
339 HABP (brown), vimentin (magenta), and CD34 (teal), CD34/Vimentin overlap (navy blue). **a,b** HA in  
340 interstitial spaces between epidermal keratinocytes (above dotted line) and between collagen bundles  
341 of the papillary dermis (below dotted line). **c,d** HA in interstitial spaces of the lamina propria (LP) and in  
342 channels through the muscularis mucosae (MM) and submucosa (SM). **e,f** HA in interstitial spaces of  
343 the adventitia around an artery (lower right, demarcated by dotted line) in the wall of the colon. The  
344 lumen of the artery is filled with red blood cells (\*, upper panel) and the muscular wall of the artery is  
345 highlighted by vimentin staining (magenta; lower panel). **g,h** Interstitial spaces of perineurium and  
346 fibroconnective tissue around the nerve (star) in the colonic wall stain for HA, as do the intercellular  
347 spaces in the nerve itself. In all multiplex stained images, vimentin staining highlights fibroblasts,  
348 mononuclear inflammatory cells, vascular smooth muscle, nerve, vascular endothelial cells, and  
349 interstitial lining cells. CD34 stains endothelial cells and interstitial lining cells. Co-localization between  
350 CD34 and vimentin (navy blue) indicates either vascular endothelium, when lining capillaries or  
351 arteriovenous structures (navy blue arrowheads), or interstitial lining cells when along collagen bundles.  
352 Scale bars = 100  $\mu\text{M}$ .

353 **Fig. 6. HA staining in interstitial spaces is continuous through all the layers of the colon into**  
354 **mesenteric soft tissues.** Adjacent colon samples were stained with H&E (left) and a triplex chromogenic  
355 assay (right) for HABP (brown), vimentin (magenta), and CD34 (teal). **a,b** Juncture of lamina propria to

356 submucosa, with channels observed through the muscularis mucosae (black arrows). There is continuity  
357 between all these layers by HA staining (right). \* marks large veins in submucosa with HA staining  
358 showing continuity between perivascular stroma and the surrounding submucosal stroma. (40X  
359 magnification). **c,d** Juncture between colonic submucosa and the muscularis propria. HA staining shows  
360 continuity of HA-filled interstitial spaces from submucosa through small pericapillary channels between  
361 muscle bundles of the muscularis propria (right). (10X magnification). **e,f** Edge of fibrovascular bundle  
362 (arrows) passing between colonic wall, through muscularis propria, into subserosa and mesenteric fascia  
363 (right). In all multiplex-stained images, staining is as in Fig. 5. Scale bars = 100  $\mu$ M.

364 **Fig. 7. Continuity between interstitial spaces, perivascular adventitia and perineurium in colonic**  
365 **submucosa.** **a** H&E section of colonic submucosa with artery (A), vein (V), and peripheral nerve (dashed  
366 lines) Arterial tunica media (muscular coat) labeled by arrow. **b** HABP-vimentin-CD34 triplex  
367 chromogenic stain of the same tissue section after de-colorization (HABP, brown; vimentin, magenta;  
368 CD34, teal). Nerves show strong vimentin staining as does the tunica media (of the artery (arrow)). HABP  
369 highlights HA in interstitial spaces, showing continuity of spaces between connective tissue of the bowel  
370 and the perivascular and perineurial stroma. A, artery; V, vein. In all multiplex-stained images, staining  
371 is as in Fig. 5. Scale bars = 100  $\mu$ M.

372 **Fig 8. Continuity of interstitial spaces through all layers of the skin into subcutaneous fascia.** Adjacent  
373 colon samples were stained with H&E (left) and a triplex chromogenic assay (right) for HABP (brown),  
374 vimentin (magenta), and CD34 (teal). **a,b** Junctional region between papillary dermis and reticular  
375 dermis with adnexal sebaceous glands (SG). HABP staining of HA shows continuity from epidermal  
376 interstitial spaces through to the reticular dermis. (10X magnification). **c,d** Rectangular regions from the  
377 top images expanded showing continuity from epidermal intercellular spaces into the papillary dermis  
378 (60X magnification). **e,f** The lower reaches of papillary dermis (\*) extending into the subcutaneous soft  
379 tissues with peri-vascular adventitia (Adv) and subcutaneous fascia separated by adipose tissue. HABP



380 staining highlights continuity between all these spaces including intercellular spaces and pericapillary  
381 spaces between adipocytes (yellow dashed line) and the larger spaces of the reticular dermis,  
382 subcutaneous fascia and perivascular adventitia (blue arrows). In all multiplex-stained images, staining is  
383 as in Fig. 5. Scale bars = 100  $\mu$ M.

384 **Figure 9. Continuity of extrahepatic interstitial spaces of the porta hepatis and intrahepatic spaces**  
385 **within the “space of Mall” demonstrated by HA localization.** **a** HA staining of interstitial spaces of  
386 structures of the portal hepatis: the adventitia of portal vein (PV), hepatic artery (\*) and within and  
387 around nerves (arrowheads). (Single stain of HA by HABP binding, DAB). **b** H&E section of liver with  
388 portal triad: hepatic artery (\*), portal vein (PV), and bile duct (BD). **c** Multiplex chromogenic assay of the  
389 same region. HABP (brown), vimentin (magenta), CD34 (teal). HABP staining is coincident with the space  
390 of Mall; it highlights HA in interstitial spaces, showing continuity between all compartments of the space  
391 of Mall. In all multiplex stained images, staining is as in Fig. 5; interstitial lining cells are in the space of  
392 Mall. Scale bars = 400  $\mu$ M.

393 **Figure 10. Interstitial spaces are a route of spread for malignant tumors.** **a** Periductal spread of hilar  
394 cholangiocarcinoma through the space of Mall of the portal tract stroma in the liver. Note the absence  
395 of invasion through the periportal limiting plate (dotted line) with tumor confined completely within the  
396 portal tract stroma, surrounding many portal structures, but not invading them, i.e. bile ducts (white  
397 arrows), hepatic artery (\*) and portal vein (black arrow). **b** Cholangiocarcinoma within interstitial spaces  
398 of portal tract stroma; same tumor as **a**. **c** Colonic adenocarcinoma (dark blue/purple glands percolating  
399 from upper left, downward) infiltrating through the submucosa and between muscle bundles of the  
400 muscularis propria. **d** Same tumor as **c** showing tumor nests (arrow heads) between pink muscle  
401 bundles without desmoplastic reaction. **e** In-transit malignant melanoma tumor deposit (\*) in deep  
402 reticular dermis and subcutaneous fascia, several centimeters away from the primary lesion. **f** Higher  
403 magnification view of melanoma (grey and blue cells) in **e** infiltrating through interstitial spaces of

404 reticular dermis between its pre-existing, pink, acellular collagen bundles. All images H&E. Scale bars =  
405 100  $\mu$ M.

406

## 407 **Acknowledgments**

408 The NYULH Center for Biospecimen Research and Development, Histology and Immunohistochemistry  
409 Laboratory (RRID:SCR\_018304) is supported in part by the Laura and Isaac Perlmutter Cancer Center  
410 Support Grant: NIH/NCI P30CA016087 and the National Institutes of Health S10 Grants; NIH/ORIP  
411 S10OD01058 and S10018338.

412

## 413 **References**

- 414 1. Mall, F.P. A study of the structural unit of the liver. *Am J Anat* **5**, 277-308 (1906).
- 415 2. Sabin, F.R. Memoir of Franklin Paine Mall 1862-1917. in *National Academy of Sciences of the*  
416 *USA Annual Meeting*, Vol. XVI (1934).
- 417 3. Kajbafzadeh, A.M., *et al.* A novel technique for simultaneous whole-body and multi-organ  
418 decellularization: umbilical artery catheterization as a perfusion-based method in a sheep foetus  
419 model. *Int J Exp Pathol* **96**, 116-132 (2015).
- 420 4. Rajab, T.K., O'Malley, T.J. & Tchantchaleishvili, V. Decellularized scaffolds for tissue engineering:  
421 Current status and future perspective. *Artif Organs* (2020).
- 422 5. Park, K.M. & Woo, H.M. Systemic decellularization for multi-organ scaffolds in rats. *Transplant*  
423 *Proc* **44**, 1151-1154 (2012).
- 424 6. Stecco, C., Adstrum, S., Hedley, G., Schleip, R. & Yucesoy, C.A. Update on fascial nomenclature. *J*  
425 *Bodyw Mov Ther* **22**, 354 (2018).

- 426 7. van der Wal, J. Van Der Wal's response to Stecco's fascial nomenclature editorial: some  
427 functional considerations as to nomenclature in the domain of the fascia and connective tissue. *J*  
428 *Bodyw Mov Ther* **19**, 304-309 (2015).
- 429 8. Stecco, C. *Functional Atlas of the Human Fascial System*, (Churchill Livingstone, London, 2018).
- 430 9. Schleip, R. & Huijing, P. in *Fasica - the tensional network of the human body* (eds. Schleip, R.,  
431 Huijing, P. & Findley, T.) (Churchill Livingstone, Edinburgh, 2012).
- 432 10. Wiig, H. & Swartz, M.A. Interstitial fluid and lymph formation and transport: physiological  
433 regulation and roles in inflammation and cancer. *Physiol Rev* **92**, 1005-1060 (2012).
- 434 11. Benias, P.C., *et al.* Structure and Distribution of an Unrecognized Interstitium in Human Tissues.  
435 *Sci Rep* **8**, 4947 (2018).
- 436 12. Theise, N.D., Benias, P.C., Carr-Locke, D.A., Wells, R.G. Reply to "Commentaries on the  
437 publication entitled: 'Structure and distribution of an unrecognized interstitium in human  
438 tissues' by Benias et al. (2018). *Eur J Anat* **23**, 483-485 (2019).
- 439 13. Guimberteau, J.C., Armstrong, C. . *Architecture of Human Living Fascia: Cells and Extracellular*  
440 *Matrix as Revealed by Endoscopy*, (Handspring Pub Ltd, 2015).
- 441 14. Khandekar, G., *et al.* Coordinated development of the mouse extrahepatic bile duct: Implications  
442 for neonatal susceptibility to biliary injury. *J Hepatol* **72**, 135-145 (2020).
- 443 15. Stern, R., Asari, A.A. & Sugahara, K.N. Hyaluronan fragments: an information-rich system. *Eur J*  
444 *Cell Biol* **85**, 699-715 (2006).
- 445 16. Swartz, M.A. & Fleury, M.E. Interstitial flow and its effects in soft tissues. *Annu Rev Biomed Eng*  
446 **9**, 229-256 (2007).
- 447 17. Wiig, H., Gyenge, C., Iversen, P.O., Gullberg, D. & Tenstad, O. The role of the extracellular matrix  
448 in tissue distribution of macromolecules in normal and pathological tissues: potential  
449 therapeutic consequences. *Microcirculation* **15**, 283-296 (2008).

- 450 18. Meng, Z.W., Pan, W., Hong, H.J., Chen, J.Z. & Chen, Y.L. Macroscopic types of intrahepatic  
451 cholangiocarcinoma and the eighth edition of AJCC/UICC TNM staging system. *Oncotarget* **8**,  
452 101165-101174 (2017).
- 453 19. Uno, M., *et al.* Periductal infiltrating type of intrahepatic cholangiocarcinoma: a rare  
454 macroscopic type without any apparent mass. *Surg Today* **42**, 1189-1194 (2012).
- 455 20. Gershenwald, J.E., *et al.* Melanoma staging: Evidence-based changes in the American Joint  
456 Committee on Cancer eighth edition cancer staging manual. *CA Cancer J Clin* **67**, 472-492 (2017).
- 457 21. Nan Tie, E., Henderson, M.A. & Gyorki, D.E. Management of in-transit melanoma metastases: a  
458 review. *ANZ J Surg* **89**, 647-652 (2019).
- 459 22. Alexander, S., Weigelin, B., Winkler, F. & Friedl, P. Preclinical intravital microscopy of the  
460 tumour-stroma interface: invasion, metastasis, and therapy response. *Curr Opin Cell Biol* **25**,  
461 659-671 (2013).
- 462 23. Beunk, L., Brown, K., Nagtegaal, I., Friedl, P. & Wolf, K. Cancer invasion into musculature:  
463 Mechanics, molecules and implications. *Semin Cell Dev Biol* **93**, 36-45 (2019).
- 464 24. Gritsenko, P.G., Ilina, O. & Friedl, P. Interstitial guidance of cancer invasion. *J Pathol* **226**, 185-  
465 199 (2012).
- 466 25. Huda, S., *et al.* Levy-like movement patterns of metastatic cancer cells revealed in  
467 microfabricated systems and implicated in vivo. *Nat Commun* **9**, 4539 (2018).
- 468 26. Hager, A., Alexander, S. & Friedl, P. Cancer invasion and resistance. *EJC Suppl* **11**, 291-293  
469 (2013).
- 470 27. Hovmand, N., *et al.* Necrotizing fasciitis and meningitis due to *Streptococcus pneumoniae*  
471 serotype 9 N: a case report. *BMC Infect Dis* **19**, 358 (2019).

- 472 28. Berg, R.D. & Garlington, A.W. Translocation of certain indigenous bacteria from the  
473 gastrointestinal tract to the mesenteric lymph nodes and other organs in a gnotobiotic mouse  
474 model. *Infect Immun* **23**, 403-411 (1979).
- 475 29. Giannelli, V., *et al.* Microbiota and the gut-liver axis: bacterial translocation, inflammation and  
476 infection in cirrhosis. *World J Gastroenterol* **20**, 16795-16810 (2014).
- 477 30. Vieira, A.T., Castelo, P.M., Ribeiro, D.A. & Ferreira, C.M. Influence of Oral and Gut Microbiota in  
478 the Health of Menopausal Women. *Front Microbiol* **8**, 1884 (2017).
- 479 31. Louveau, A., *et al.* Structural and functional features of central nervous system lymphatic  
480 vessels. *Nature* **523**, 337-341 (2015).
- 481 32. Aspelund, A., *et al.* A dural lymphatic vascular system that drains brain interstitial fluid and  
482 macromolecules. *J Exp Med* **212**, 991-999 (2015).
- 483 33. Carabotti, M., Scirocco, A., Maselli, M.A. & Severi, C. The gut-brain axis: interactions between  
484 enteric microbiota, central and enteric nervous systems. *Ann Gastroenterol* **28**, 203-209 (2015).
- 485 34. Hall, J. Guyton and Hall Textbook of Medical Physiology. 286-287 (Saunders/Elsevier,  
486 Philadelphia, 2011).
- 487 35. Carson, F. & Cappellano, C. *Histotechnology: A Self Instructional Text*, (ASCP Press, Chicago,  
488 2015).
- 489 36. Trivedi, A., Cartun, R.W. & Ligato, S. Role of lymphovascular invasion and immunohistochemical  
490 expression of IMP3 in the risk stratification of superficially invasive pT1 esophageal  
491 adenocarcinoma. *Pathol Res Pract* **210**, 402-406 (2014).
- 492 37. Wang, C., *et al.* Comparing digital histology slides with multiple staining based on decoloring and  
493 dyeing technique. in *2019 IEEE International Conference on Bioinformatics and Biomedicine*  
494 *(BIBM)*, 2709-2714 (2019).

- 495 38. Fuhrmann, I.K., Steinhagen, J., Ruther, W. & Schumacher, U. Comparative immunohistochemical  
496 evaluation of the zonal distribution of extracellular matrix and inflammation markers in human  
497 meniscus in osteoarthritis and rheumatoid arthritis. *Acta Histochem* **117**, 243-254 (2015).
- 498 39. Day, W.A., *et al.* Covalently deposited dyes: a new chromogen paradigm that facilitates analysis  
499 of multiple biomarkers in situ. *Lab Invest* **97**, 104-113 (2017).
- 500 40. Taube, J.M., *et al.* The Society for Immunotherapy of Cancer statement on best practices for  
501 multiplex immunohistochemistry (IHC) and immunofluorescence (IF) staining and validation. *J*  
502 *Immunother Cancer* **8**(2020).
- 503

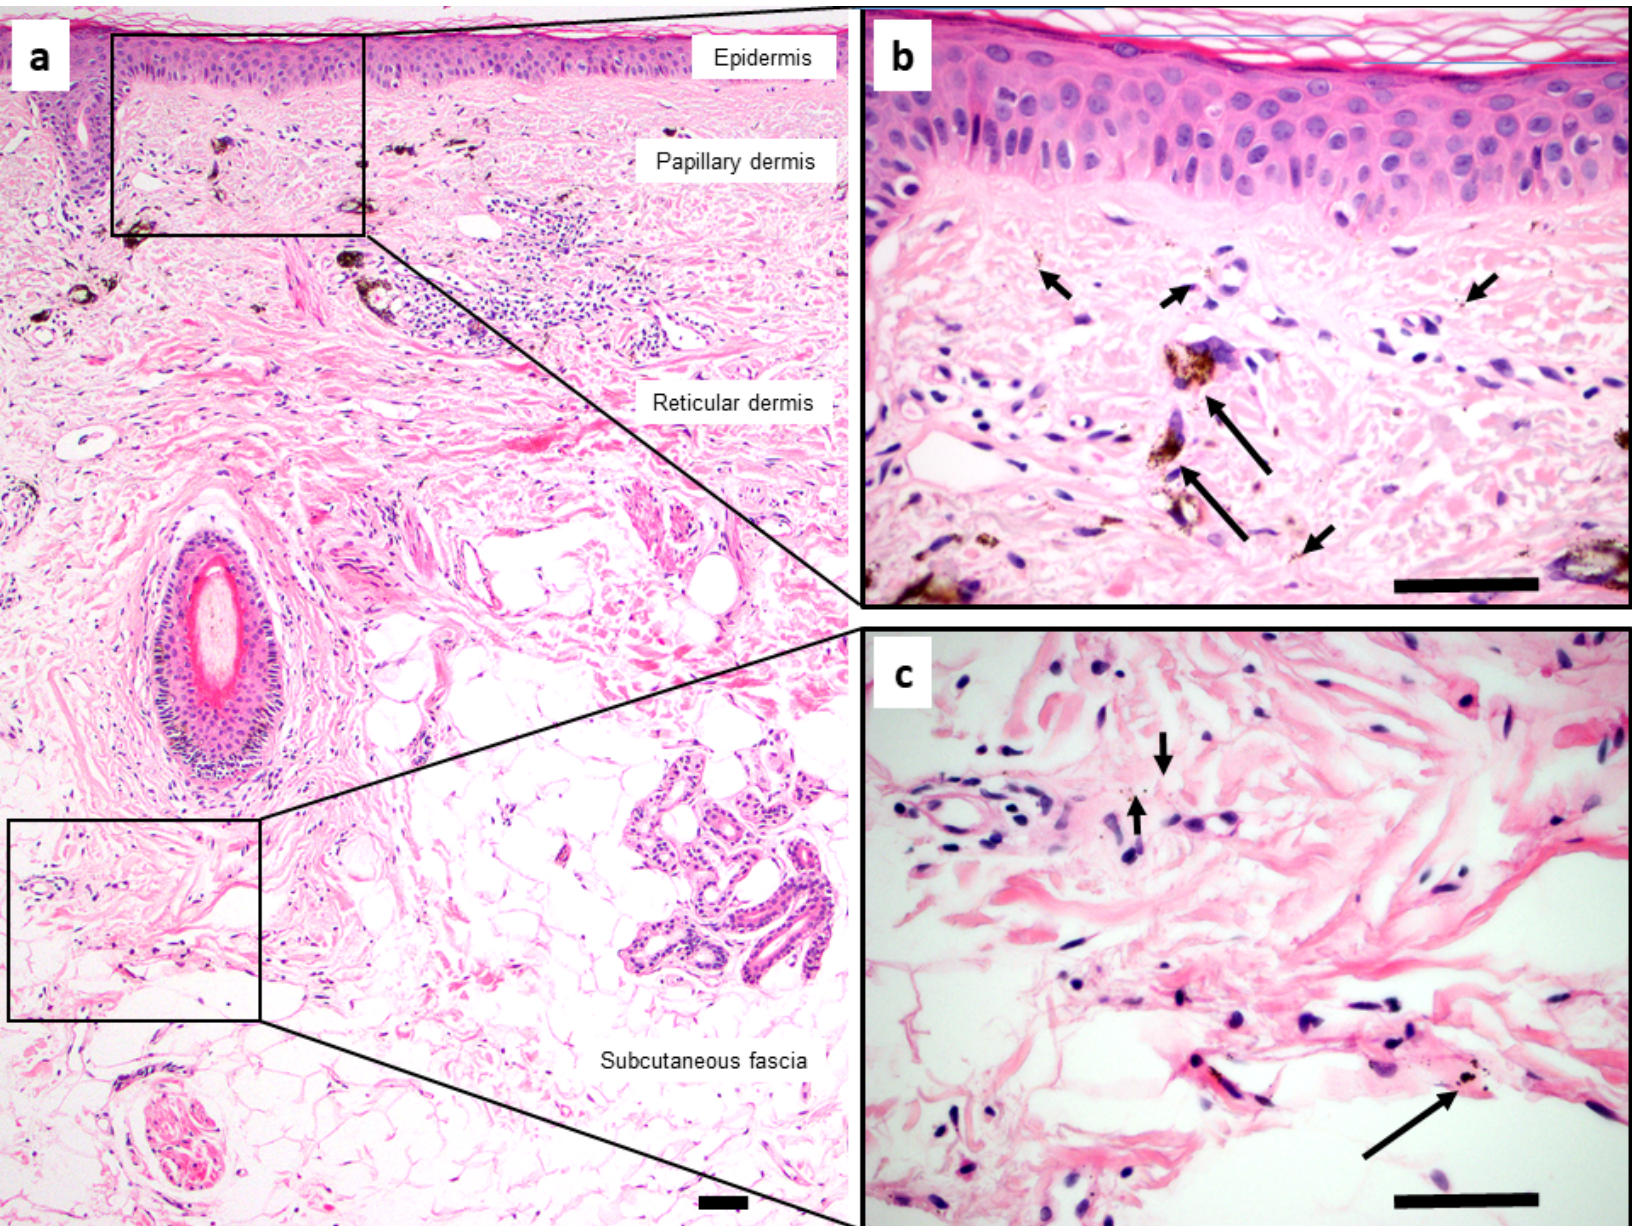

**Papillary Dermis**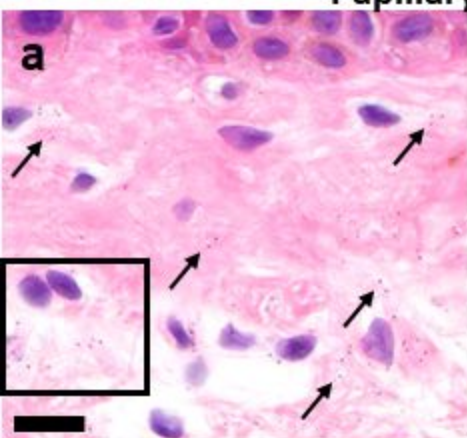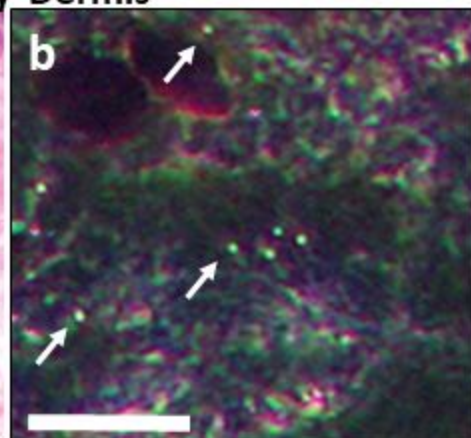**Reticular Dermis**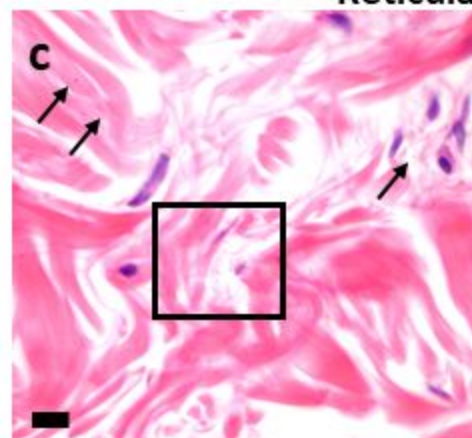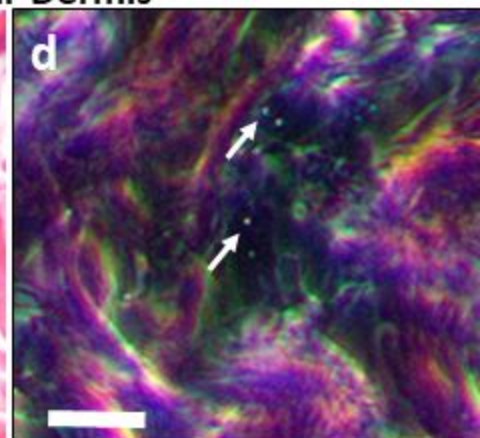**Subcutaneous Fascia**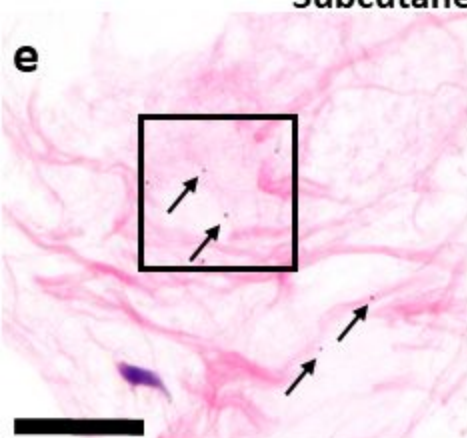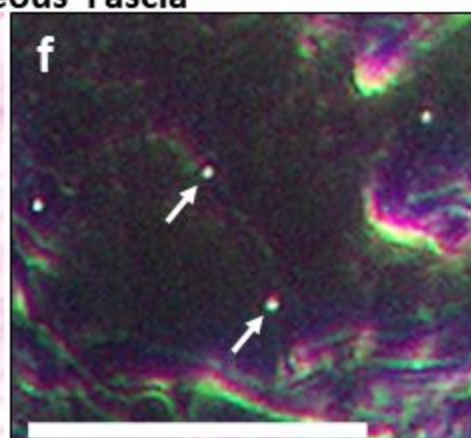**Skin Adnexa**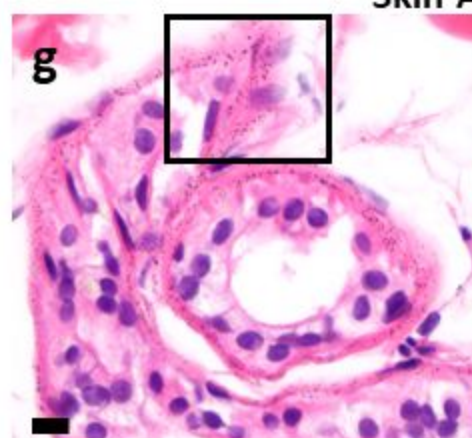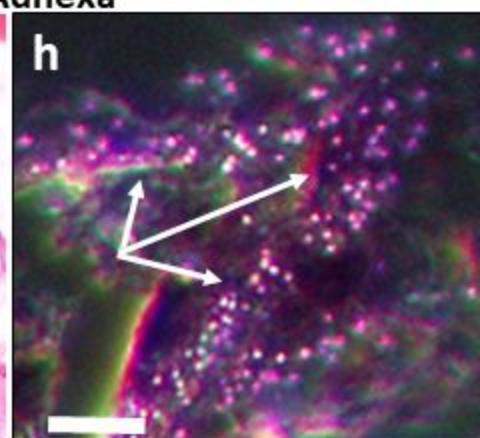**Adventitia**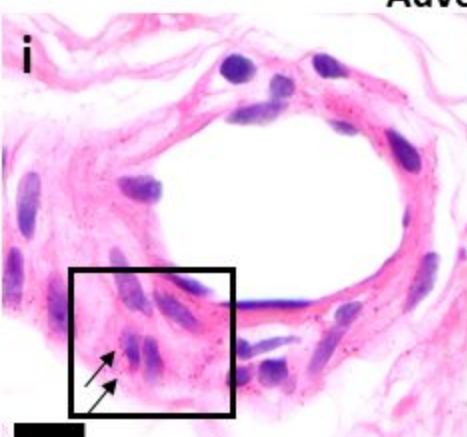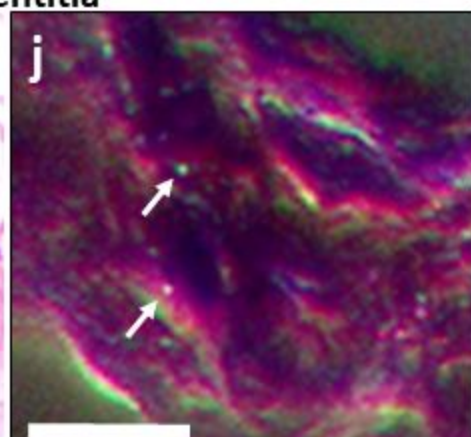**Perineurium**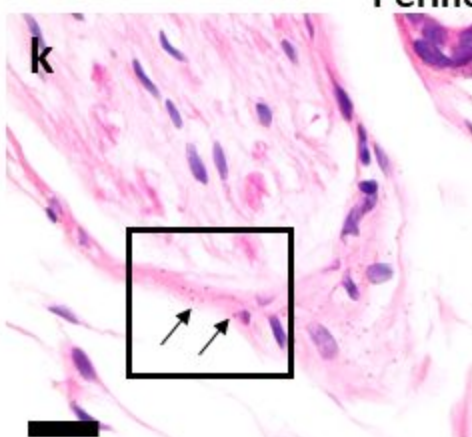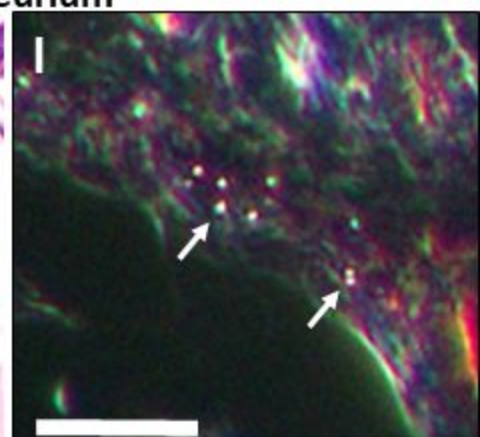



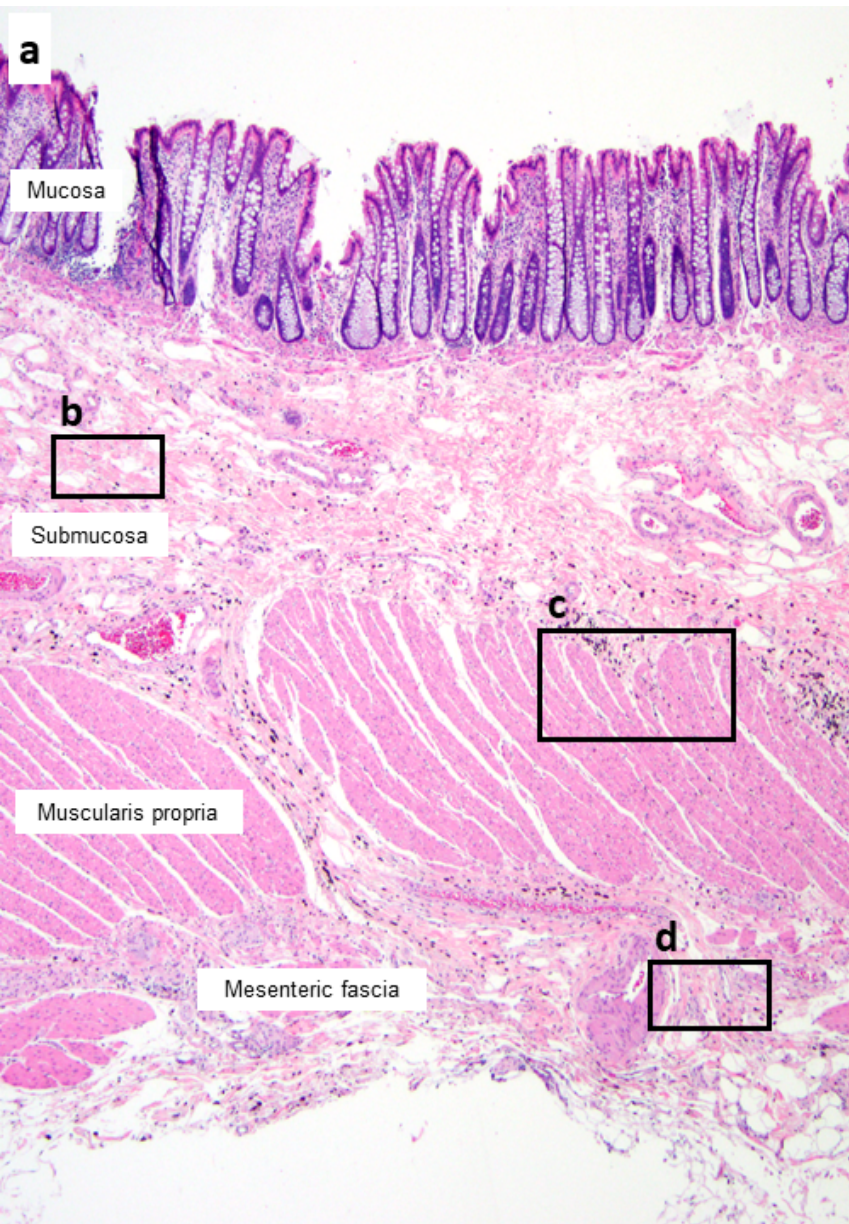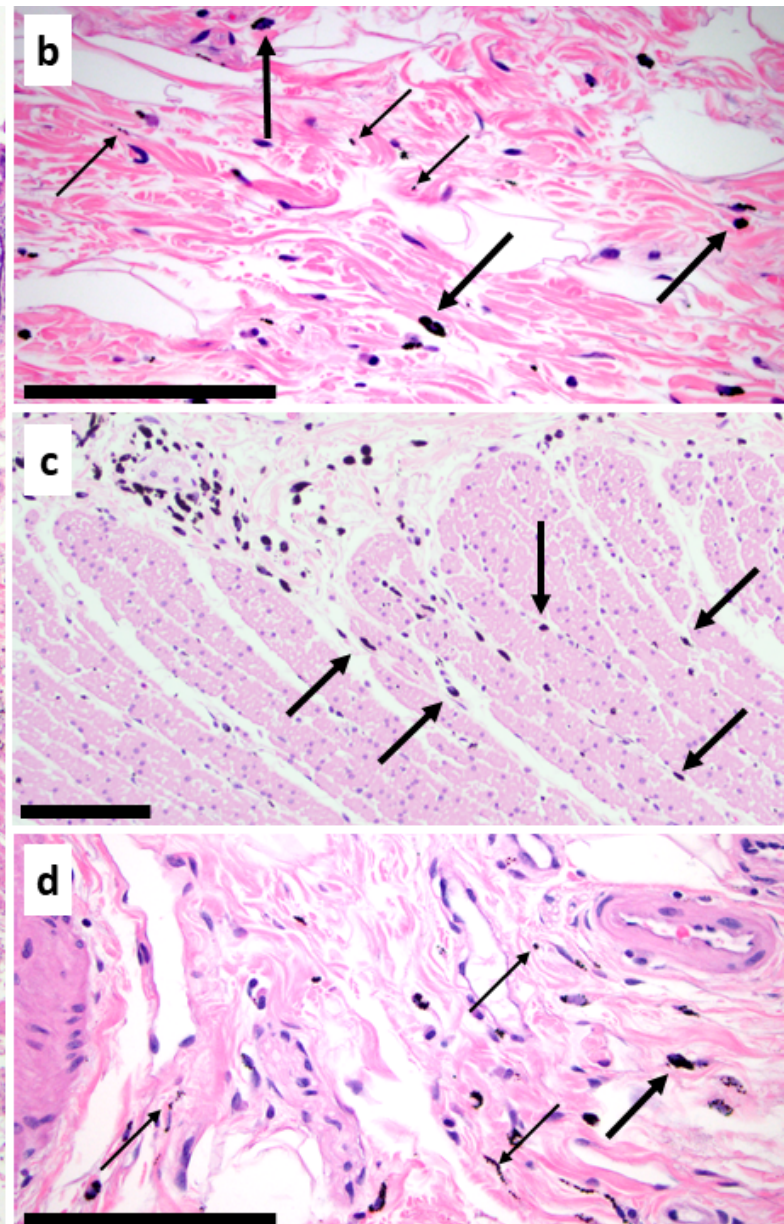

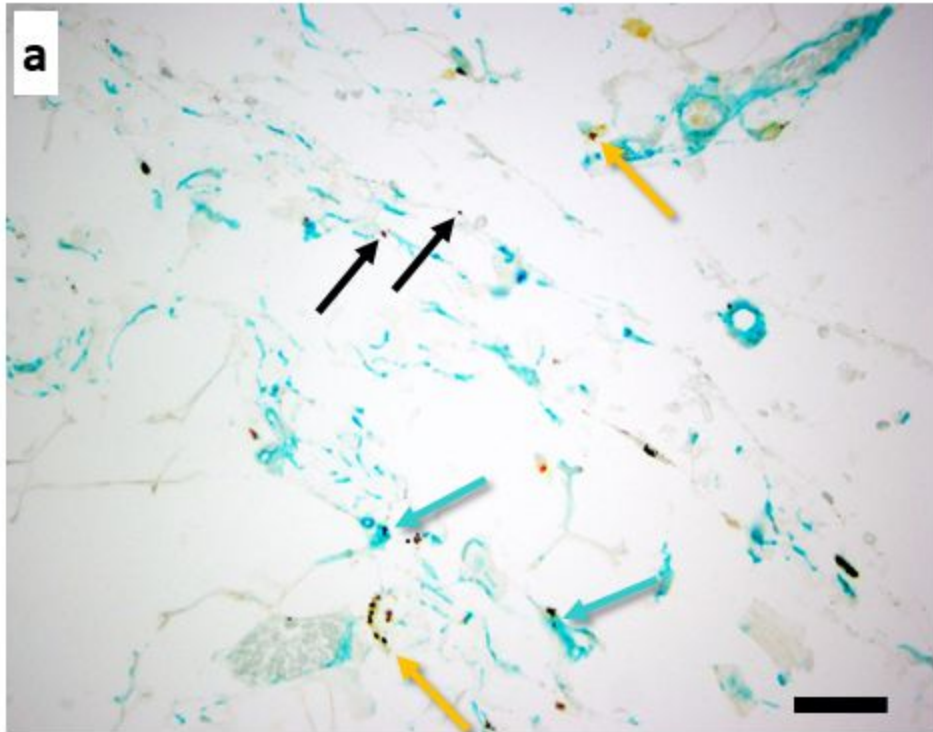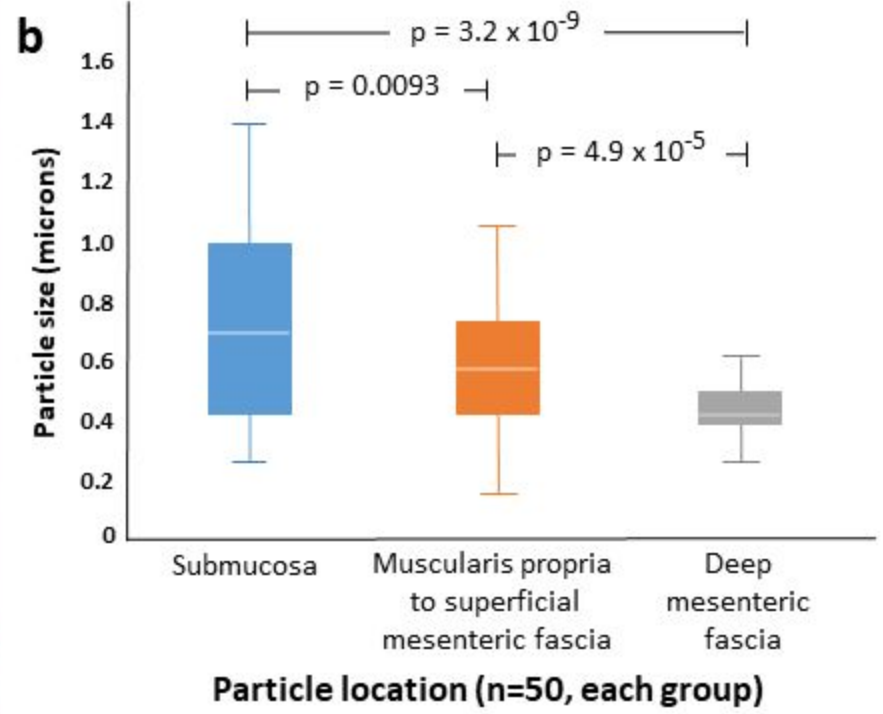

**Skin**  
Epidermis to  
Papillary dermis

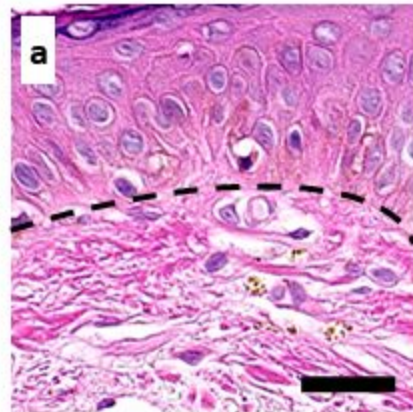

H&E

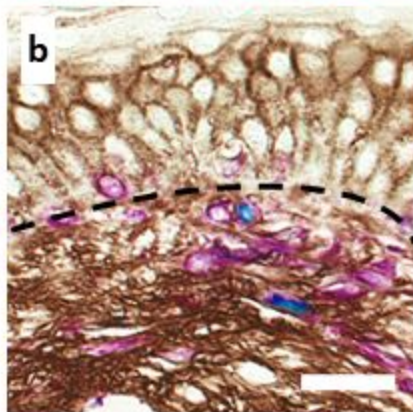

HA-HABP  
CD34  
Vimentin  
CD34/  
Vimentin

**Colon**  
Lamina Propria  
to Submucosa

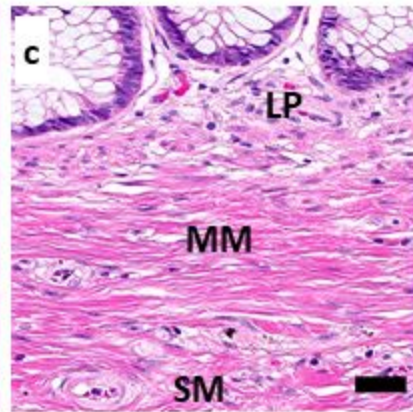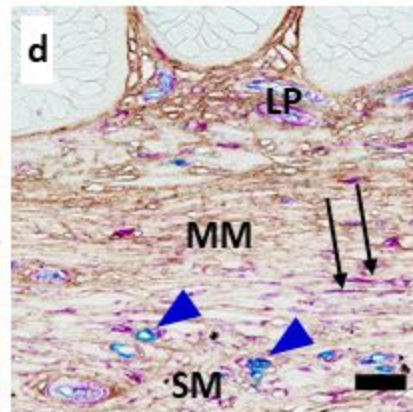

**Periarterial  
Adventitia in  
Colon Submucosa**

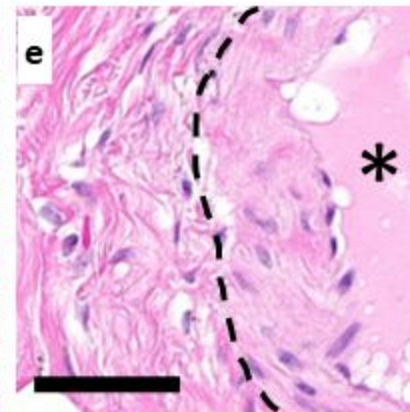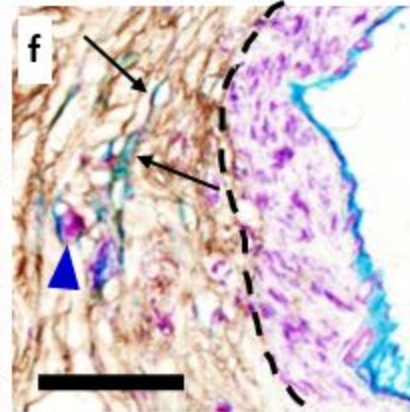

**Perineurium in  
Dermis**

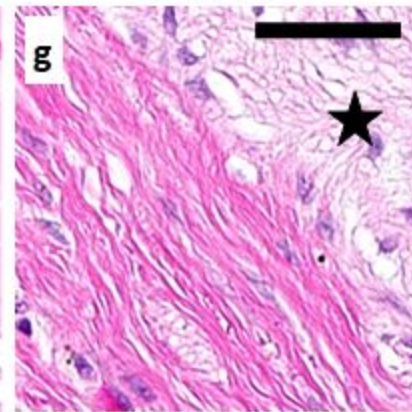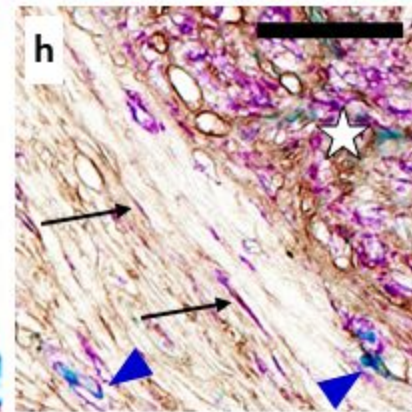

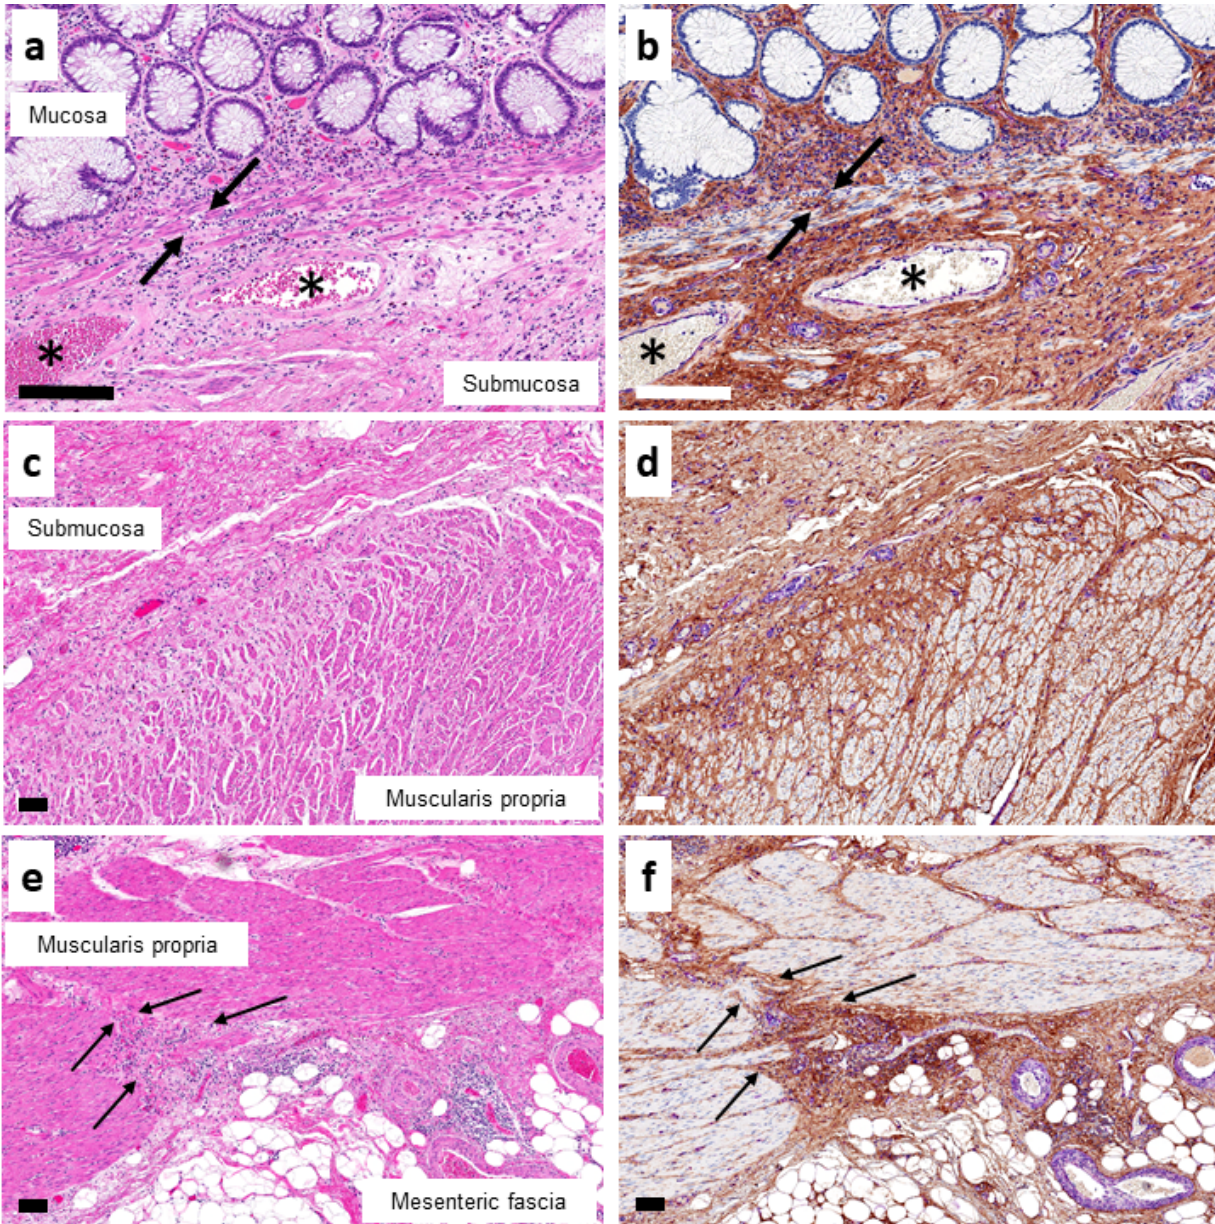

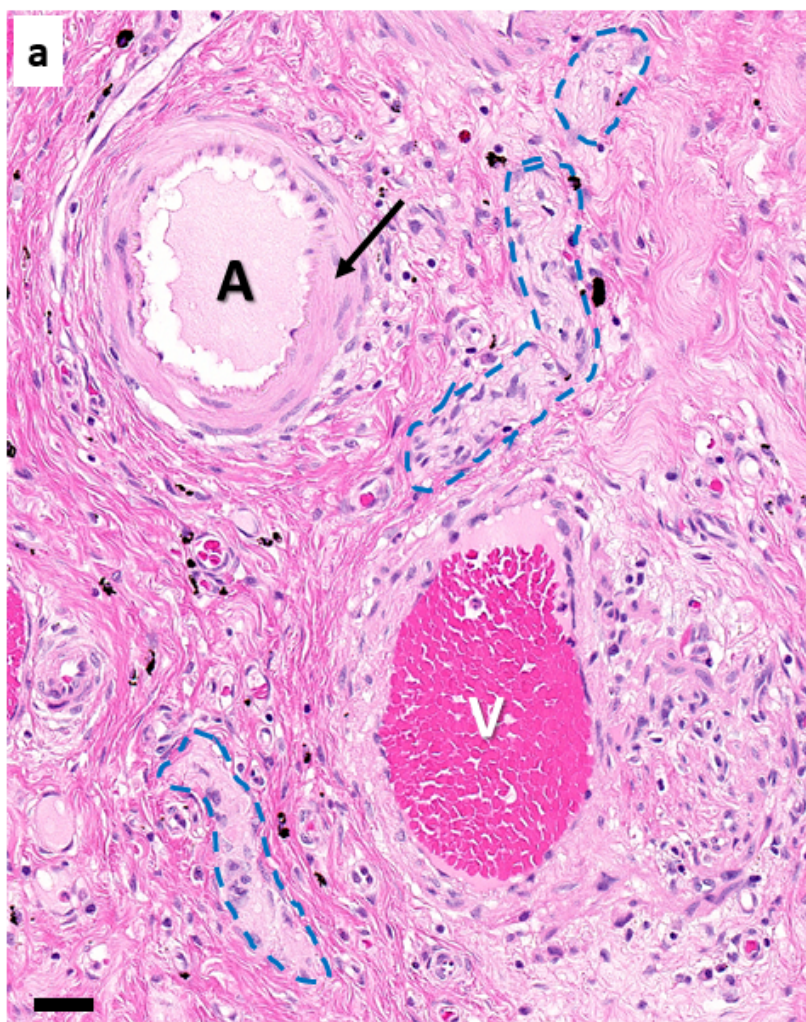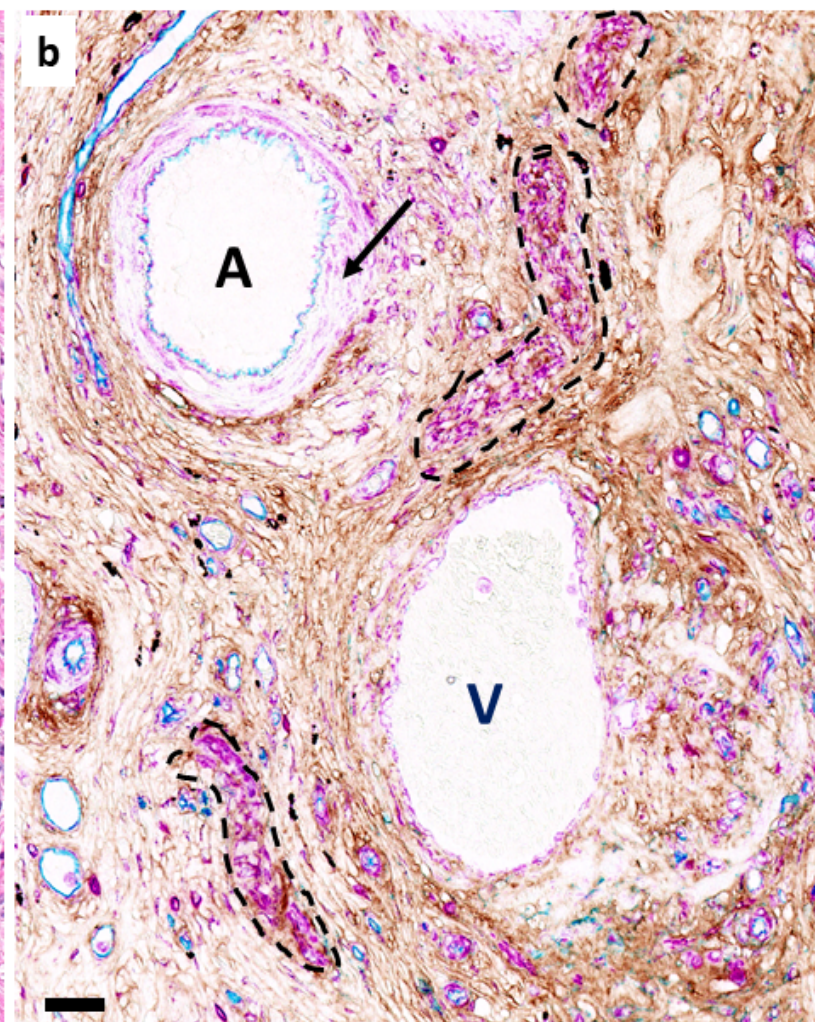

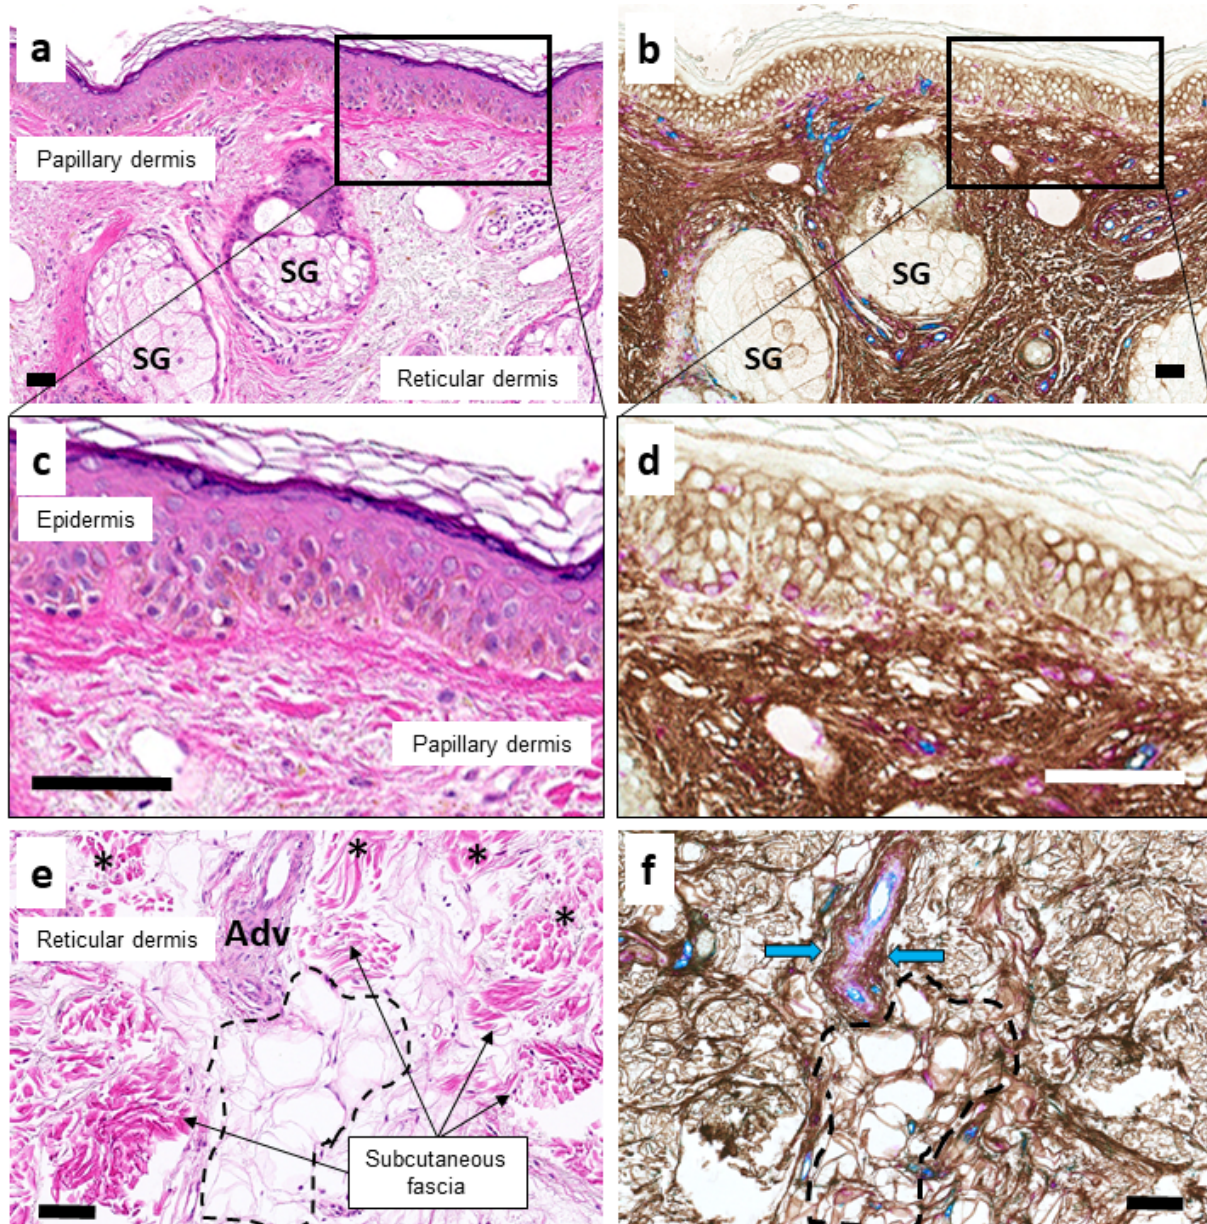

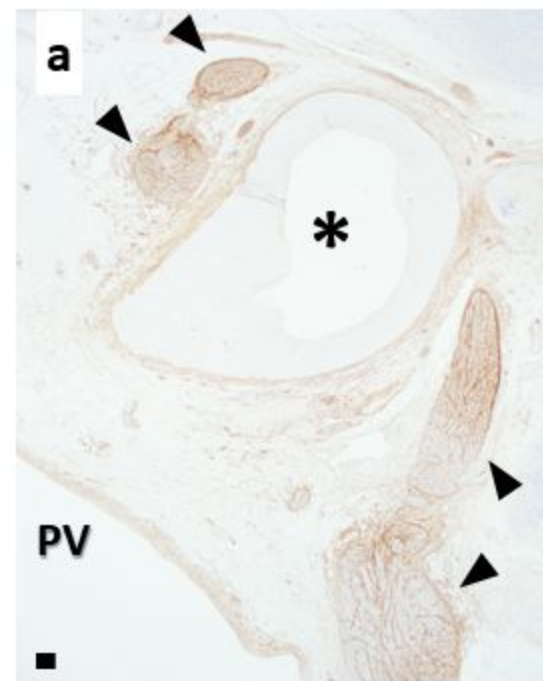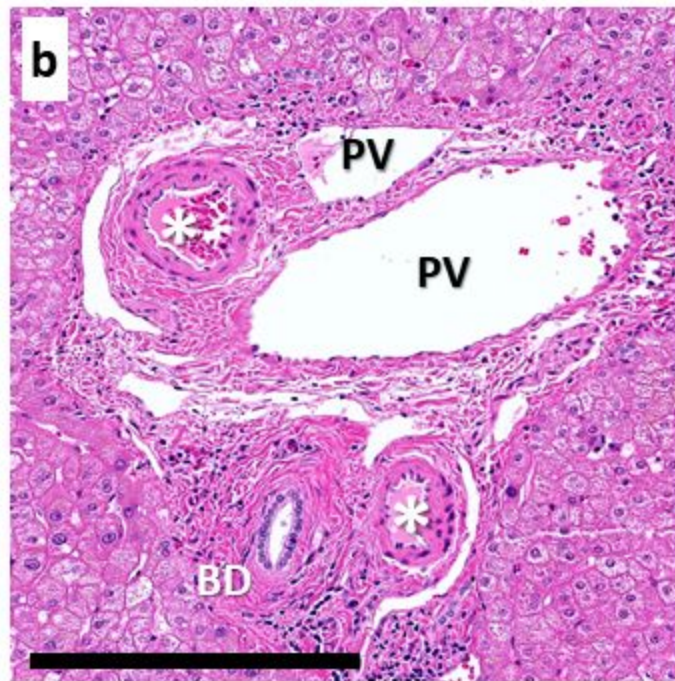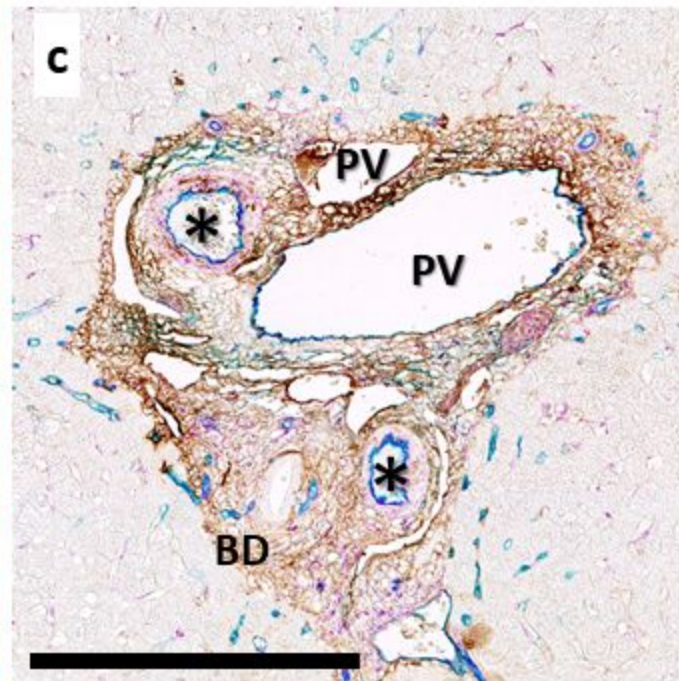

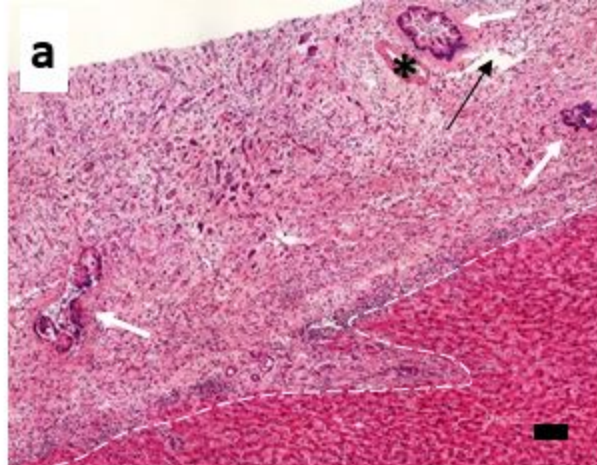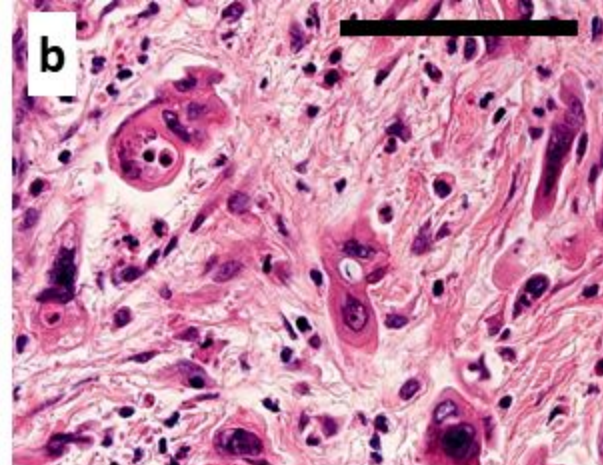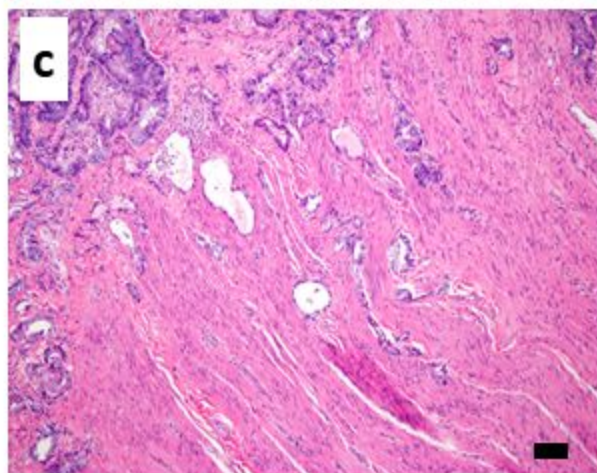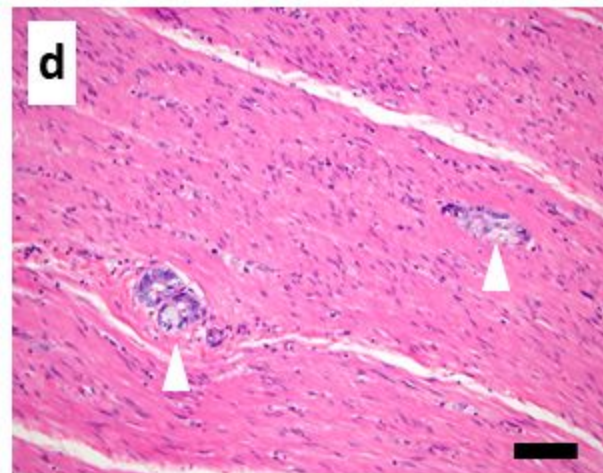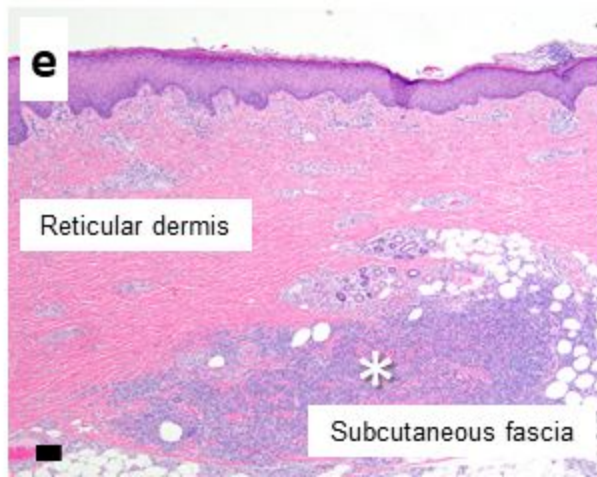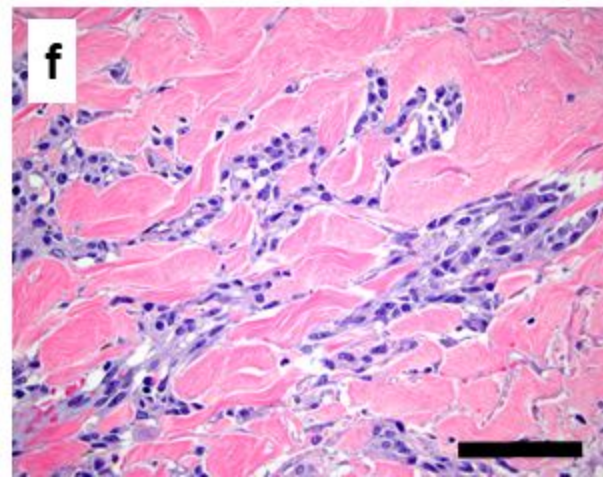

Source: https://www.biorxiv.org/content/10.1101/2020.08.07.239806v1.full.pdf
